# Supplementary material
Source: PubMed Central journal article supplement (PMC4237624)
Supplement: NIHMS635696-supplement-Supplementary_Information.pdf [file NIHMS635696-supplement-Supplementary_Information.pdf]

**Supporting Information for**

**Geometric and Electronic Structure of a Peroxomanganese(III)  
Complex Supported by a Scorpionate Ligand**

**Hannah E. Colmer, Robert A. Geiger, Domenick F. Leto, Gayan B. Wijeratne, Victor W. Day and  
Timothy A. Jackson\***

**Table S1.** Crystal data and structure refinement for [Mn(Tp<sup>Ph2</sup>)(DMF)<sub>3</sub>](OTf).

|                                   |                                                                                   |                                         |
|-----------------------------------|-----------------------------------------------------------------------------------|-----------------------------------------|
| Empirical formula                 | C <sub>59</sub> H <sub>63</sub> BF <sub>3</sub> MnN <sub>9</sub> O <sub>7</sub> S |                                         |
| Formula weight                    | 1164.99                                                                           |                                         |
| Temperature                       | 100(2) K                                                                          |                                         |
| Wavelength                        | 1.54178 Å                                                                         |                                         |
| Crystal system                    | Monoclinic                                                                        |                                         |
| Space group                       | P2(1)/n                                                                           |                                         |
| Unit cell dimensions              | a = 17.6441(10) Å<br>b = 14.8052(8) Å<br>c = 21.9441(11) Å                        | α = 90°.<br>β = 93.243(4)°.<br>γ = 90°. |
| Volume                            | 5723.2(5) Å <sup>3</sup>                                                          |                                         |
| Z                                 | 4                                                                                 |                                         |
| Density (calculated)              | 1.352 Mg/m <sup>3</sup>                                                           |                                         |
| Absorption coefficient            | 2.805 mm <sup>-1</sup>                                                            |                                         |
| F(000)                            | 2436                                                                              |                                         |
| Crystal size                      | 0.22 x 0.01 x 0.01 mm <sup>3</sup>                                                |                                         |
| Theta range for data collection   | 10.74 to 66.71°.                                                                  |                                         |
| Index ranges                      | -20 ≤ h ≤ 20, -17 ≤ k ≤ 16, -24 ≤ l ≤ 25                                          |                                         |
| Reflections collected             | 19229                                                                             |                                         |
| Independent reflections           | 9144 [R(int) = 0.1286]                                                            |                                         |
| Completeness to theta = 66.71°    | 90.2 %                                                                            |                                         |
| Absorption correction             | Multi-scan                                                                        |                                         |
| Max. and min. transmission        | 1.000 and 0.793                                                                   |                                         |
| Refinement method                 | Full-matrix least-squares on F <sup>2</sup>                                       |                                         |
| Data / restraints / parameters    | 9144 / 0 / 709                                                                    |                                         |
| Goodness-of-fit on F <sup>2</sup> | 0.928                                                                             |                                         |
| Final R indices [I > 2σ(I)]       | R1 = 0.0638, wR2 = 0.1504                                                         |                                         |
| R indices (all data)              | R1 = 0.0984, wR2 = 0.1649                                                         |                                         |
| Largest diff. peak and hole       | 1.402 and -0.894 e.Å <sup>-3</sup>                                                |                                         |

$$R_1 = \frac{\sum ||F_O| - |F_C||}{\sum |F_O|}$$

$$wR_2 = \left\{ \frac{\sum [w(F_O^2 - F_C^2)^2]}{\sum [w(F_O^2)]} \right\}^{1/2}$$

**Table S2.** Crystal data and structure refinement for [Mn(O<sub>2</sub>)(Tp<sup>Ph2</sup>)(THF)].

|                                   |                                                                  |                  |
|-----------------------------------|------------------------------------------------------------------|------------------|
| Empirical formula                 | C <sub>58</sub> H <sub>62</sub> BMnN <sub>6</sub> O <sub>5</sub> |                  |
| Formula weight                    | 988.89                                                           |                  |
| Temperature                       | 100(2) K                                                         |                  |
| Wavelength                        | 1.54178 Å                                                        |                  |
| Crystal system                    | Monoclinic                                                       |                  |
| Space group                       | P2(1)/n                                                          |                  |
| Unit cell dimensions              | a = 12.928(2) Å                                                  | α = 90°.         |
|                                   | b = 21.642(4) Å                                                  | β = 103.572(4)°. |
|                                   | c = 18.633(3) Å                                                  | γ = 90°.         |
| Volume                            | 5067.5(15) Å <sup>3</sup>                                        |                  |
| Z                                 | 4                                                                |                  |
| Density (calculated)              | 1.296 Mg/m <sup>3</sup>                                          |                  |
| Absorption coefficient            | 2.562 mm <sup>-1</sup>                                           |                  |
| F(000)                            | 2088                                                             |                  |
| Crystal size                      | 0.23 x 0.20 x 0.06 mm <sup>3</sup>                               |                  |
| Theta range for data collection   | 3.18 to 66.52°.                                                  |                  |
| Index ranges                      | -15 ≤ h ≤ 15, -25 ≤ k ≤ 19, -                                    |                  |
|                                   | 21 ≤ l ≤ 21                                                      |                  |
| Reflections collected             | 45183                                                            |                  |
| Independent reflections           | 8594 [R(int) = 0.0482]                                           |                  |
| Completeness to theta = 66.52°    | 96.2 %                                                           |                  |
| Absorption correction             | Multi-scan                                                       |                  |
| Max. and min. transmission        | 1.000 and 0.810                                                  |                  |
| Refinement method                 | Full-matrix least-squares on F <sup>2</sup>                      |                  |
| Data / restraints / parameters    | 8594 / 30 / 693                                                  |                  |
| Goodness-of-fit on F <sup>2</sup> | 1.077                                                            |                  |
| Final R indices [I > 2σ(I)]       | R1 = 0.0514, wR2 = 0.1460                                        |                  |
| R indices (all data)              | R1 = 0.0528, wR2 = 0.1474                                        |                  |
| Largest diff. peak and hole       | 0.944 and -0.535 e.Å <sup>-3</sup>                               |                  |

---

$$R_1 = \frac{\sum ||F_o| - |F_c||}{\sum |F_o|}$$
$$wR_2 = \left\{ \frac{\sum [w(F_o^2 - F_c^2)^2]}{\sum [w(F_o^2)]} \right\}^{1/2}$$

**Table S3.** Cartesian coordinates (Å) for DFT energy minimized [Mn<sup>III</sup>(O<sub>2</sub>)(Tp<sup>Ph2</sup>)(THF)] model.

| <b>Atom</b> | <b>x</b>  | <b>y</b>  | <b>z</b>  |
|-------------|-----------|-----------|-----------|
| Mn          | 2.311278  | 5.168113  | 8.572887  |
| O           | 3.759224  | 4.994203  | 7.408479  |
| O           | 3.702012  | 3.944327  | 8.39639   |
| O           | 3.642094  | 6.494182  | 10.025693 |
| N           | 0.531187  | 4.095032  | 7.443028  |
| N           | 1.29661   | 6.924038  | 8.086569  |
| N           | 1.148728  | 4.746492  | 10.261434 |
| N           | -0.182102 | 5.072468  | 10.203946 |
| N           | -0.675955 | 4.675571  | 7.737045  |
| N           | 0.002915  | 7.007179  | 8.533482  |
| B           | -0.777242 | 5.703335  | 8.899954  |
| C           | -1.695933 | 4.029288  | 7.074486  |
| C           | -1.115549 | 2.982868  | 6.349993  |
| C           | 0.278409  | 3.060868  | 6.59728   |
| C           | -0.446171 | 8.298971  | 8.418836  |
| C           | 0.597253  | 9.057491  | 7.86571   |
| C           | 1.672346  | 8.164192  | 7.669132  |
| C           | -0.75983  | 4.883731  | 11.434879 |
| C           | 0.246276  | 4.439276  | 12.307237 |
| C           | 1.423074  | 4.346505  | 11.533707 |
| C           | -3.122816 | 4.41319   | 7.087925  |
| C           | -3.54652  | 5.755614  | 6.936598  |
| C           | -4.913374 | 6.0725    | 6.883498  |
| C           | -5.883315 | 5.057732  | 6.973848  |
| C           | -5.475734 | 3.718441  | 7.116625  |
| C           | -4.108853 | 3.39927   | 7.172456  |
| C           | 1.30298   | 2.165797  | 6.016736  |
| C           | 2.617277  | 2.598687  | 5.724944  |
| C           | 3.542085  | 1.72037   | 5.134432  |
| C           | 3.177311  | 0.397649  | 4.823422  |
| C           | 1.871992  | -0.04476  | 5.110218  |
| C           | 0.945819  | 0.829963  | 5.700579  |
| C           | -1.782401 | 8.793367  | 8.814209  |
| C           | -2.36368  | 8.482828  | 10.065985 |
| C           | -3.606851 | 9.02433   | 10.429283 |
| C           | -4.289297 | 9.888691  | 9.554043  |
| C           | -3.71636  | 10.213329 | 8.310792  |
| C           | -2.473499 | 9.67219   | 7.944217  |
| C           | 2.987638  | 8.483451  | 7.077143  |
| C           | 3.620911  | 9.706662  | 7.406037  |
| C           | 4.844505  | 10.061323 | 6.815830  |

|   |           |           |           |
|---|-----------|-----------|-----------|
| C | 5.45373   | 9.201693  | 5.882800  |
| C | 4.827141  | 7.989516  | 5.541610  |
| C | 3.603509  | 7.632058  | 6.130691  |
| C | -2.188855 | 5.066142  | 11.768434 |
| C | -2.529037 | 5.709462  | 12.984204 |
| C | -3.871567 | 5.841674  | 13.374697 |
| C | -4.898018 | 5.33189   | 12.558414 |
| C | -4.571156 | 4.683966  | 11.353178 |
| C | -3.22971  | 4.547236  | 10.961781 |
| C | 2.73614   | 3.843311  | 11.987691 |
| C | 3.221705  | 4.221099  | 13.263644 |
| C | 4.440482  | 3.716821  | 13.745588 |
| C | 5.192825  | 2.821935  | 12.961949 |
| C | 4.712988  | 2.431209  | 11.698561 |
| C | 3.493368  | 2.933361  | 11.214475 |
| C | 3.214411  | 7.534751  | 10.950286 |
| C | 4.458382  | 7.897943  | 11.769279 |
| C | 5.597298  | 7.621325  | 10.769254 |
| C | 5.096992  | 6.365083  | 10.052628 |
| H | -1.633772 | 2.301757  | 5.664913  |
| H | 0.573997  | 10.127612 | 7.630868  |
| H | 0.117627  | 4.134897  | 13.352104 |
| H | -2.798897 | 6.558025  | 6.835146  |
| H | -5.222622 | 7.123673  | 6.760456  |
| H | -6.956171 | 5.310218  | 6.927996  |
| H | -6.227323 | 2.914172  | 7.187294  |
| H | -3.795155 | 2.348989  | 7.294857  |
| H | 2.918763  | 3.630836  | 5.962713  |
| H | 4.561822  | 2.077277  | 4.912743  |
| H | 3.907777  | -0.287954 | 4.361568  |
| H | 1.573301  | -1.080472 | 4.877377  |
| H | -0.067449 | 0.466800  | 5.937741  |
| H | -1.830297 | 7.827967  | 10.772099 |
| H | -4.042706 | 8.770735  | 11.409456 |
| H | -5.266041 | 10.310907 | 9.842117  |
| H | -4.242647 | 10.890437 | 7.617011  |
| H | -2.034985 | 9.920592  | 6.963872  |
| H | 3.152575  | 10.380976 | 8.142642  |
| H | 5.326333  | 11.015049 | 7.088299  |
| H | 6.414766  | 9.479021  | 5.419004  |
| H | 5.291717  | 7.314972  | 4.803005  |
| H | 3.108311  | 6.694600  | 5.835317  |
| H | -1.728767 | 6.118134  | 13.622552 |

|   |           |          |           |
|---|-----------|----------|-----------|
| H | -4.117554 | 6.347139 | 14.323221 |
| H | -5.952724 | 5.435496 | 12.864199 |
| H | -5.367271 | 4.272972 | 10.711187 |
| H | -2.989236 | 4.012554 | 10.029806 |
| H | 2.638872  | 4.927288 | 13.878533 |
| H | 4.804938  | 4.026285 | 14.738921 |
| H | 6.149941  | 2.424872 | 13.338375 |
| H | 5.289454  | 1.720031 | 11.083498 |
| H | 3.111419  | 2.594062 | 10.240319 |
| H | 2.377791  | 7.134522 | 11.563455 |
| H | 2.839901  | 8.401869 | 10.357583 |
| H | 4.548801  | 7.229166 | 12.652852 |
| H | 4.433434  | 8.948472 | 12.128501 |
| H | 6.581008  | 7.462723 | 11.259597 |
| H | 5.697716  | 8.464468 | 10.05032  |
| H | 5.441171  | 6.266887 | 9.00275   |
| H | 5.355249  | 5.434518 | 10.608295 |
| H | -1.937045 | 5.988601 | 9.095838  |

---

**Table S4.** Cartesian coordinates (Å) for DFT energy minimized [Mn<sup>III</sup>(O<sub>2</sub>)(Tp<sup>Ph,Me</sup>)(THF)] model.

| Atom | x         | y         | z         |
|------|-----------|-----------|-----------|
| Mn   | 0.000000  | 0.000000  | 0.000000  |
| O    | -1.854526 | -0.208260 | 0.000000  |
| O    | -1.146840 | -1.465504 | 0.000000  |
| O    | -0.005152 | 0.023431  | -2.374784 |
| N    | 0.554751  | 0.222984  | 2.288960  |
| N    | 0.422438  | 2.040054  | -0.095163 |
| N    | 1.996603  | -0.607940 | -0.156403 |
| N    | 2.941567  | 0.180790  | 0.448265  |
| N    | 1.645044  | 1.035517  | 2.467048  |
| N    | 1.679688  | 2.407126  | 0.310880  |
| B    | 2.503175  | 1.458400  | 1.240795  |
| H    | 1.965103  | 0.401315  | -2.965131 |
| H    | 0.811331  | 1.778758  | -3.177974 |
| H    | 1.094151  | -0.767126 | -4.910694 |
| H    | 0.826253  | 0.924577  | -5.468045 |
| H    | -1.346370 | -0.758565 | -5.322228 |
| H    | -1.507980 | 0.897011  | -4.630129 |
| H    | -2.023934 | -0.417048 | -2.630224 |
| H    | -0.879026 | -1.733182 | -3.114965 |
| C    | 1.952702  | 1.143215  | 3.805244  |
| C    | 1.035736  | 0.348942  | 4.501687  |
| C    | 0.171948  | -0.203017 | 3.522113  |
| C    | 1.934412  | 3.698883  | -0.076457 |
| C    | 0.790612  | 4.170579  | -0.739223 |
| C    | -0.136448 | 3.106179  | -0.731116 |
| C    | 4.197678  | -0.263296 | 0.117264  |
| C    | 4.041581  | -1.362002 | -0.742549 |
| C    | 2.650747  | -1.560981 | -0.875946 |
| C    | -0.976385 | -1.094036 | 3.796608  |
| C    | -2.144382 | -1.100905 | 2.999333  |
| C    | -3.225688 | -1.936912 | 3.326875  |
| C    | -3.165543 | -2.779826 | 4.451711  |
| C    | -2.007546 | -2.782201 | 5.252257  |
| C    | -0.925333 | -1.948628 | 4.927554  |
| C    | -1.507375 | 3.126127  | -1.281144 |
| C    | -1.753936 | 3.779178  | -2.513289 |
| C    | -3.055885 | 3.861944  | -3.032318 |
| C    | -4.134627 | 3.297766  | -2.326143 |
| C    | -3.901288 | 2.656452  | -1.096238 |
| C    | -2.600070 | 2.571823  | -0.574954 |

|   |           |           |           |
|---|-----------|-----------|-----------|
| C | 1.985969  | -2.652351 | -1.617856 |
| C | 2.486468  | -3.035666 | -2.886368 |
| C | 1.910216  | -4.104372 | -3.591907 |
| C | 0.826309  | -4.811774 | -3.039042 |
| C | 0.330039  | -4.446494 | -1.774390 |
| C | 0.904071  | -3.377344 | -1.066210 |
| C | 3.214759  | 4.419824  | 0.225905  |
| C | 3.086361  | 1.970499  | 4.335954  |
| C | 5.460792  | 0.367289  | 0.624043  |
| C | 0.933721  | 0.674864  | -3.277404 |
| C | 0.565863  | 0.184153  | -4.682396 |
| C | -0.949525 | -0.062209 | -4.553541 |
| C | -1.062399 | -0.634444 | -3.138688 |
| H | 3.492381  | 2.046726  | 1.615276  |
| H | 0.957352  | 0.250788  | 5.590734  |
| H | 0.649626  | 5.168311  | -1.169924 |
| H | 4.840432  | -1.993399 | -1.147665 |
| H | -2.207079 | -0.447402 | 2.115160  |
| H | -4.128744 | -1.926589 | 2.693807  |
| H | -4.016544 | -3.435210 | 4.703125  |
| H | -1.943596 | -3.441719 | 6.133777  |
| H | -0.016637 | -1.972864 | 5.550875  |
| H | -0.911633 | 4.216276  | -3.075513 |
| H | -3.228510 | 4.369022  | -3.996197 |
| H | -5.157363 | 3.361839  | -2.732977 |
| H | -4.742160 | 2.221369  | -0.530538 |
| H | -2.432990 | 2.092598  | 0.401633  |
| H | 3.331422  | -2.480029 | -3.326602 |
| H | 2.309877  | -4.384938 | -4.580270 |
| H | 0.372393  | -5.651080 | -3.591267 |
| H | -0.510326 | -5.003867 | -1.327723 |
| H | 0.531657  | -3.124044 | -0.063106 |
| H | 3.369838  | 4.549662  | 1.319588  |
| H | 3.194452  | 5.427419  | -0.239545 |
| H | 4.101007  | 3.875328  | -0.167488 |
| H | 3.068625  | 1.962994  | 5.445390  |
| H | 3.021343  | 3.029507  | 4.001104  |
| H | 4.079329  | 1.584314  | 4.012533  |
| H | 5.570631  | 1.418656  | 0.277484  |
| H | 6.337323  | -0.204244 | 0.255003  |
| H | 5.502460  | 0.379169  | 1.734679  |

---



**Table S5.** Cartesian coordinates (Å) for DFT energy minimized (for hydrogen atoms only) brown isomer of [Mn<sup>III</sup>(O<sub>2</sub>)(Tp<sup>iPr<sub>2</sub></sup>)(pz<sup>iPr<sub>2</sub></sup>H)] (253 K structure).

| Atom | x            | y            | z            |
|------|--------------|--------------|--------------|
| Mn   | 2.01447016   | 1.349043599  | 0.00327932   |
| O    | 1.712240055  | -0.326615503 | 0.730450237  |
| O    | 2.367811342  | 0.559555395  | 1.639152294  |
| N    | 2.569381402  | 3.340234155  | 0.001640721  |
| N    | 2.792937349  | 3.972397518  | -1.216212397 |
| N    | 3.947886629  | 1.192752816  | -1.177116358 |
| N    | 4.117912651  | 2.102260045  | -2.181296997 |
| N    | 1.233897449  | 1.353811255  | -1.909490532 |
| N    | 1.672062199  | 2.330093985  | -2.778835509 |
| N    | -0.159210252 | 2.109086546  | 0.699998912  |
| N    | -0.859296861 | 1.210045325  | 1.455327724  |
| B    | 2.996300519  | 3.110552737  | -2.462206373 |
| C    | 3.787454413  | 3.454165474  | 2.993131239  |
| C    | 1.86674869   | 4.974279105  | 3.237830859  |
| C    | 2.455886111  | 3.869399126  | 2.418020921  |
| C    | 2.616025286  | 4.266356113  | 0.959478637  |
| C    | 2.860665187  | 5.504302762  | 0.396868278  |
| C    | 2.970945886  | 5.293455297  | -0.961904885 |
| C    | 3.206054857  | 6.279747046  | -2.063200645 |
| C    | 1.874698219  | 6.828050971  | -2.581475962 |
| C    | 4.100847387  | 7.409017388  | -1.59887337  |
| C    | 6.003852607  | -1.709410189 | -0.494142106 |
| C    | 6.088006664  | 0.098564147  | 1.193591245  |
| C    | 5.315811129  | -0.479740088 | 0.039542604  |
| C    | 5.115977525  | 0.542211131  | -1.042664969 |
| C    | 6.040407695  | 1.030692222  | -1.984553008 |
| C    | 5.395657495  | 2.031762905  | -2.688598938 |
| C    | 5.925747057  | 2.985736292  | -3.698944342 |
| C    | 7.013596091  | 2.3730936    | -4.546516414 |
| C    | 6.423755122  | 4.212885809  | -2.993617443 |
| C    | 0.005324619  | -1.705801692 | -2.234321956 |
| C    | -2.048508986 | -0.272497035 | -1.992474278 |
| C    | -0.54458949  | -0.370445183 | -1.790810439 |
| C    | 0.173855566  | 0.757666042  | -2.468428894 |
| C    | -0.096685621 | 1.329517019  | -3.714056819 |
| C    | 0.862719409  | 2.324906221  | -3.883583598 |
| C    | 1.012792478  | 3.292288786  | -5.011830047 |
| C    | 2.034732059  | 2.779515382  | -6.042506001 |
| C    | -0.333044931 | 3.544417767  | -5.687733624 |

|   |              |              |              |
|---|--------------|--------------|--------------|
| C | -1.450967226 | 4.155911148  | -1.772148596 |
| C | -1.002356082 | 5.525750777  | 0.237017502  |
| C | -0.697443735 | 4.238458396  | -0.443479224 |
| C | -1.045907053 | 3.063013439  | 0.401085442  |
| C | -2.295185976 | 2.757532126  | 0.959845089  |
| C | -2.14972163  | 1.565167769  | 1.645280252  |
| C | -3.097687502 | 0.748491441  | 2.40258236   |
| C | -4.227705953 | 0.248965874  | 1.454545173  |
| C | -3.723190819 | 1.539803196  | 3.527792252  |
| H | -0.354361262 | 0.371998824  | 1.763691879  |
| H | 3.676292935  | 3.113065177  | 4.043772568  |
| H | 4.243273132  | 2.620107226  | 2.422992438  |
| H | 4.508410111  | 4.299281277  | 2.989795352  |
| H | 2.531783118  | 5.864013248  | 3.268240347  |
| H | 0.88062472   | 5.311221898  | 2.857078781  |
| H | 1.720589634  | 4.650506619  | 4.289054889  |
| H | 1.77573158   | 2.990844382  | 2.432308421  |
| H | 2.956159891  | 6.462479438  | 0.916085913  |
| H | 3.70437125   | 5.747437944  | -2.898844762 |
| H | 1.334904717  | 7.375482022  | -1.781174982 |
| H | 2.036146543  | 7.53277926   | -3.42385506  |
| H | 1.208160533  | 6.017947568  | -2.940294259 |
| H | 5.071812333  | 7.03982647   | -1.21063067  |
| H | 4.314761818  | 8.111391529  | -2.430743835 |
| H | 3.623063284  | 8.002044043  | -0.79118299  |
| H | 6.109518663  | -2.48261377  | 0.295768753  |
| H | 5.448301939  | -2.168280216 | -1.33787537  |
| H | 7.028599246  | -1.480176919 | -0.858130307 |
| H | 6.200823511  | -0.644397389 | 2.011363574  |
| H | 7.109121353  | 0.411150477  | 0.885499576  |
| H | 5.582222854  | 0.986677743  | 1.62294455   |
| H | 4.303149229  | -0.759236209 | 0.400778435  |
| H | 7.073389873  | 0.69534377   | -2.126099346 |
| H | 5.086809832  | 3.278952675  | -4.367033247 |
| H | 6.669122714  | 1.459838887  | -5.073103477 |
| H | 7.368016027  | 3.092569673  | -5.313302373 |
| H | 7.897092322  | 2.092119443  | -3.935361836 |
| H | 7.278520559  | 3.965969435  | -2.329104861 |
| H | 6.773051745  | 4.985932299  | -3.711523812 |
| H | 5.645817098  | 4.677143115  | -2.356449856 |
| H | -0.488178326 | -2.54014218  | -1.692472192 |
| H | -0.156837615 | -1.872620312 | -3.321042215 |
| H | 1.094385583  | -1.780985407 | -2.042690721 |

|   |              |              |              |
|---|--------------|--------------|--------------|
| H | -2.449275581 | 0.696846903  | -1.633958514 |
| H | -2.327325608 | -0.381171999 | -3.062390422 |
| H | -2.570412836 | -1.082998676 | -1.44260082  |
| H | -0.33240542  | -0.270904875 | -0.705551579 |
| H | -0.90404568  | 1.069261098  | -4.403775521 |
| H | 1.389323155  | 4.251561273  | -4.598116876 |
| H | 1.697531782  | 1.81699924   | -6.479548044 |
| H | 2.161315683  | 3.506220351  | -6.871859825 |
| H | 3.029009769  | 2.609204208  | -5.583512946 |
| H | -1.099558997 | 3.896796293  | -4.969133068 |
| H | -0.231788679 | 4.311622029  | -6.482552527 |
| H | -0.71988083  | 2.62432959   | -6.172441027 |
| H | -2.548237534 | 4.223727741  | -1.611952554 |
| H | -1.165037441 | 4.995726251  | -2.440088451 |
| H | -1.243499503 | 3.209296562  | -2.305970988 |
| H | -0.46299008  | 5.633502072  | 1.200144409  |
| H | -0.719281511 | 6.392854455  | -0.395755955 |
| H | -2.087080987 | 5.630162473  | 0.456229108  |
| H | 0.386468577  | 4.181984348  | -0.656693698 |
| H | -3.210985307 | 3.354892561  | 0.887826743  |
| H | -2.564875133 | -0.134493521 | 2.817567651  |
| H | -4.785319756 | 1.110287002  | 1.034505112  |
| H | -3.821289915 | -0.339514775 | 0.608619437  |
| H | -4.948305457 | -0.389209748 | 2.006268787  |
| H | -2.96474     | 1.922830972  | 4.241348211  |
| H | -4.281409147 | 2.415384522  | 3.136725249  |
| H | -4.441569443 | 0.919544754  | 4.102939776  |
| H | 3.265055747  | 3.809138399  | -3.404168309 |

---

**Table S6.** Cartesian coordinates (Å) for DFT energy minimized (for hydrogen atoms only) blue isomer of [Mn<sup>III</sup>(O<sub>2</sub>)(Tp<sup>iPr2</sup>)(pz<sup>iPr2</sup>H)] (193 K structure).

| Atom | x            | y            | z            |
|------|--------------|--------------|--------------|
| Mn   | 0.003281554  | 0.003672271  | 0.002376072  |
| O    | 1.846980039  | 0.00327784   | 0.003695983  |
| O    | 1.326432464  | 1.339191421  | 0.001040796  |
| N    | -1.861465091 | 0.941560535  | 0.033207174  |
| N    | -2.941409734 | 0.252532817  | -0.421690018 |
| N    | -0.516025497 | -0.335937192 | -2.15315674  |
| N    | -1.777189772 | -0.836061885 | -2.392659211 |
| N    | -0.764292583 | -1.873011845 | 0.216061439  |
| N    | -2.026184365 | -2.141236763 | -0.222154884 |
| N    | 0.031948506  | 0.142757329  | 2.407450238  |
| N    | 1.129695761  | 0.86378811   | 2.775800075  |
| B    | -2.72792984  | -1.075433928 | -1.185044751 |
| C    | -1.552656131 | 3.364767215  | 2.516288994  |
| C    | -1.450831401 | 4.475637592  | 0.344920437  |
| C    | -1.340691782 | 3.148854546  | 1.053758624  |
| C    | -2.291002951 | 2.106809597  | 0.52709932   |
| C    | -3.657793996 | 2.15685687   | 0.367572915  |
| C    | -4.071108359 | 0.99984759   | -0.241485724 |
| C    | -5.424988969 | 0.558578284  | -0.653382682 |
| C    | -6.493564245 | 1.038168042  | 0.303182221  |
| C    | -5.765639362 | 1.107149374  | -2.015629346 |
| C    | 1.601316085  | 1.603421689  | -3.942945422 |
| C    | 2.354509855  | -0.687017262 | -4.181994343 |
| C    | 1.515911379  | 0.23224641   | -3.421663028 |
| C    | 0.0967369    | -0.238429858 | -3.337643447 |
| C    | -0.78205607  | -0.661760185 | -4.327230716 |
| C    | -1.963325382 | -1.023426823 | -3.72472465  |
| C    | -3.204788904 | -1.602707879 | -4.251644467 |
| C    | -3.616371695 | -0.894257191 | -5.529591549 |
| C    | -3.141252816 | -3.013750163 | -4.601566573 |
| C    | 1.187479521  | -4.007810111 | 2.562823058  |
| C    | 2.038231612  | -3.473436935 | 0.369414843  |
| C    | 1.064095451  | -3.067134033 | 1.396923213  |
| C    | -0.346459717 | -2.998149685 | 0.842789784  |
| C    | -1.348205897 | -3.929988991 | 0.80687533   |
| C    | -2.415360957 | -3.383398917 | 0.15199075   |
| C    | -3.783207604 | -3.918578148 | -0.116767411 |
| C    | -4.781452644 | -3.349648104 | 0.890060228  |
| C    | -3.75193933  | -5.46478775  | -0.036680421 |

|   |              |              |              |
|---|--------------|--------------|--------------|
| C | -3.016885958 | -0.200868297 | 3.377613894  |
| C | -1.973161701 | -1.816397704 | 4.749495316  |
| C | -1.812414665 | -0.97283549  | 3.550789108  |
| C | -0.559279259 | -0.187283303 | 3.58012752   |
| C | 0.226239409  | 0.346670885  | 4.624334921  |
| C | 1.293169021  | 1.006278189  | 4.083621882  |
| C | 2.411386533  | 1.777825793  | 4.615596095  |
| C | 2.227133901  | 3.233354269  | 4.529163254  |
| C | 2.711057955  | 1.440490994  | 6.025066535  |
| H | 1.673851264  | 1.247732559  | 1.986035665  |
| H | -1.422664591 | 2.436769085  | 3.108142906  |
| H | -0.839816475 | 4.115305949  | 2.918534564  |
| H | -2.574568728 | 3.749432264  | 2.725248028  |
| H | -2.449454039 | 4.93830458   | 0.497852058  |
| H | -0.696544089 | 5.188388614  | 0.737547984  |
| H | -1.289898216 | 4.38793117   | -0.749557463 |
| H | -0.318260302 | 2.745804484  | 0.893718635  |
| H | -4.308688078 | 2.987149494  | 0.666224577  |
| H | -5.437877128 | -0.550011213 | -0.691498007 |
| H | -6.319924141 | 0.695909834  | 1.344496928  |
| H | -6.549819979 | 2.146327104  | 0.323423302  |
| H | -7.491617302 | 0.668870142  | -0.009506611 |
| H | -5.772956872 | 2.216911285  | -2.002395674 |
| H | -5.037481727 | 0.796916048  | -2.793659769 |
| H | -6.769924858 | 0.769169811  | -2.347040904 |
| H | 1.001840883  | 2.321060138  | -3.346074027 |
| H | 2.648946033  | 1.974990731  | -3.939451473 |
| H | 1.241521298  | 1.673163594  | -4.994171953 |
| H | 2.053702572  | -0.74846944  | -5.252213966 |
| H | 3.418197371  | -0.365088135 | -4.176512937 |
| H | 2.329030555  | -1.723177557 | -3.783666189 |
| H | 1.875011818  | 0.242501922  | -2.368407865 |
| H | -0.574736784 | -0.69986727  | -5.403757705 |
| H | -4.000378795 | -1.444860263 | -3.494913941 |
| H | -3.724282223 | 0.20321527   | -5.400594096 |
| H | -2.866475452 | -1.05687865  | -6.331780198 |
| H | -4.584493419 | -1.283877792 | -5.906286201 |
| H | -4.118528496 | -3.384396478 | -4.975683545 |
| H | -2.393987637 | -3.205812759 | -5.401419694 |
| H | -2.856090667 | -3.669132207 | -3.748948302 |
| H | 0.98665721   | -5.058545975 | 2.26112186   |
| H | 2.216164606  | -3.984621546 | 2.977133244  |
| H | 0.49014086   | -3.76326832  | 3.391200995  |

|   |              |              |              |
|---|--------------|--------------|--------------|
| H | 2.026996345  | -2.808661048 | -0.519159864 |
| H | 3.074385906  | -3.458038488 | 0.768991091  |
| H | 1.843898077  | -4.506441423 | 0.006725637  |
| H | 1.307527909  | -2.036927449 | 1.736890957  |
| H | -1.302625373 | -4.933553813 | 1.242809673  |
| H | -4.091444475 | -3.620051834 | -1.140289929 |
| H | -4.505598271 | -3.644360744 | 1.923765902  |
| H | -4.811850089 | -2.242198892 | 0.856815963  |
| H | -5.807433115 | -3.724389031 | 0.692170337  |
| H | -4.747587347 | -5.887210003 | -0.28174348  |
| H | -3.012925408 | -5.895984735 | -0.740986501 |
| H | -3.491524614 | -5.804102017 | 0.986615673  |
| H | -3.208039926 | 0.472545826  | 4.243518317  |
| H | -3.006096449 | 0.443469685  | 2.476471192  |
| H | -3.908209794 | -0.857629089 | 3.28868026   |
| H | -2.865564413 | -2.470864608 | 4.666718453  |
| H | -1.100576848 | -2.476179265 | 4.942931423  |
| H | -2.119033891 | -1.202597694 | 5.665890234  |
| H | -1.703851173 | -1.646324323 | 2.670676072  |
| H | 0.021308796  | 0.237102947  | 5.696266931  |
| H | 3.30222586   | 1.506408385  | 3.99940545   |
| H | 1.374851379  | 3.571670446  | 5.157096959  |
| H | 3.129361386  | 3.774101411  | 4.883218184  |
| H | 2.02416239   | 3.590298321  | 3.497085984  |
| H | 2.897264726  | 0.357405455  | 6.182871877  |
| H | 3.607025414  | 1.984857007  | 6.386395748  |
| H | 1.872087028  | 1.725964463  | 6.695859394  |
| H | -3.785877568 | -1.512572101 | -1.545398481 |

---

**Table S7.** Cartesian coordinates (Å) for DFT energy minimized (for hydrogen atoms only) brown isomer of  $[\text{Mn}^{\text{III}}(\text{O}_2)(\text{Tp}^{\text{iPr}_2})(\text{pz}^{\text{iPr}_2}\text{H})]$  (253 K structure).

| Atom | x            | y            | z            |
|------|--------------|--------------|--------------|
| Mn   | 1.841544249  | 1.622823228  | -0.163209007 |
| O    | 1.517299205  | -0.05181286  | 0.695567336  |
| O    | 2.220261861  | 0.917842393  | 1.513477577  |
| N    | 2.418803064  | 3.607006142  | -0.118279615 |
| N    | 2.811588365  | 4.18741708   | -1.300545407 |
| N    | 3.845589071  | 1.285997299  | -1.201209733 |
| N    | 4.17127718   | 2.221227547  | -2.151898905 |
| N    | 1.146328873  | 1.707438728  | -2.118406164 |
| N    | 1.801346956  | 2.54417315   | -2.992099894 |
| N    | -0.453133688 | 2.164718202  | 0.677798985  |
| N    | -0.821189834 | 1.132050295  | 1.477747968  |
| B    | 3.103529459  | 3.280843024  | -2.54072868  |
| C    | 3.40730173   | 3.755162678  | 3.001226182  |
| C    | 1.489391276  | 5.425727922  | 3.027383269  |
| C    | 2.125018164  | 4.237980993  | 2.285818889  |
| C    | 2.417904631  | 4.56425297   | 0.839602399  |
| C    | 2.801885344  | 5.790230733  | 0.25465205   |
| C    | 3.045185606  | 5.520809507  | -1.101420163 |
| C    | 3.422953886  | 6.47900693   | -2.209209276 |
| C    | 2.174672833  | 6.9231845    | -3.004578282 |
| C    | 4.197482457  | 7.693624194  | -1.669424009 |
| C    | 5.2529137    | -2.006658557 | -0.755697626 |
| C    | 5.829116843  | -0.395264984 | 1.130908309  |
| C    | 4.897081997  | -0.674039148 | -0.066685186 |
| C    | 4.912006212  | 0.475488819  | -1.048242817 |
| C    | 5.949273227  | 0.896831935  | -1.917629027 |
| C    | 5.450810011  | 2.011505687  | -2.604152955 |
| C    | 6.147074623  | 2.906828238  | -3.604796088 |
| C    | 7.117351434  | 2.114505079  | -4.499440288 |
| C    | 6.873547897  | 4.070978506  | -2.893526591 |
| C    | -0.029703628 | -1.34856496  | -2.251028377 |
| C    | -2.128542846 | -0.006084182 | -2.772296103 |
| C    | -0.717426201 | 0.032815644  | -2.161752568 |
| C    | 0.146535079  | 1.097238555  | -2.798186726 |
| C    | 0.14783607   | 1.565218552  | -4.129450392 |
| C    | 1.209077466  | 2.477953171  | -4.223902597 |
| C    | 1.697109002  | 3.239758844  | -5.4357979   |
| C    | 2.765383441  | 2.430255837  | -6.204779815 |
| C    | 0.532483124  | 3.640266651  | -6.359328901 |

---

|   |              |              |              |
|---|--------------|--------------|--------------|
| C | -2.067632358 | 4.142699333  | -1.452023849 |
| C | -2.118968984 | 5.498501736  | 0.694740788  |
| C | -1.439723801 | 4.338443037  | -0.054643761 |
| C | -1.469311495 | 3.0541103    | 0.746210682  |
| C | -2.4877414   | 2.560341003  | 1.606424749  |
| C | -2.035194489 | 1.31222328   | 2.061095643  |
| C | -2.634583112 | 0.297879368  | 3.006861628  |
| C | -4.025550662 | -0.16680256  | 2.530407974  |
| C | -2.683910916 | 0.83944621   | 4.45160654   |
| H | -0.145080995 | 0.342961297  | 1.502401652  |
| H | 3.179890099  | 3.461682198  | 4.046884905  |
| H | 3.844646869  | 2.876232126  | 2.488054458  |
| H | 4.17354281   | 4.558271447  | 3.028131159  |
| H | 2.190092902  | 6.284728028  | 3.094173124  |
| H | 0.567107429  | 5.778362204  | 2.523523922  |
| H | 1.224055344  | 5.136225116  | 4.064386704  |
| H | 1.403647798  | 3.392984893  | 2.28299604   |
| H | 2.895998469  | 6.75825167   | 0.755535294  |
| H | 4.087635324  | 5.932497767  | -2.911444787 |
| H | 1.470376335  | 7.479637512  | -2.352021747 |
| H | 2.462641365  | 7.587144435  | -3.845800867 |
| H | 1.630510456  | 6.05322151   | -3.423308931 |
| H | 5.096916069  | 7.386092119  | -1.099067204 |
| H | 4.525855477  | 8.343356722  | -2.505799502 |
| H | 3.564611285  | 8.3124303    | -0.999658523 |
| H | 5.185681675  | -2.848177902 | -0.035151365 |
| H | 4.566060522  | -2.223473722 | -1.598883922 |
| H | 6.288528481  | -1.993455077 | -1.157446231 |
| H | 5.776453521  | -1.22308175  | 1.868615551  |
| H | 6.88683564   | -0.298087166 | 0.805317467  |
| H | 5.542487755  | 0.541127881  | 1.649584537  |
| H | 3.858456191  | -0.745684959 | 0.317114468  |
| H | 6.939779438  | 0.444952146  | -2.035769167 |
| H | 5.365275535  | 3.350220291  | -4.257135693 |
| H | 6.604477211  | 1.282170029  | -5.022106136 |
| H | 7.568179649  | 2.778053211  | -5.26557106  |
| H | 7.949619625  | 1.680986263  | -3.906775694 |
| H | 7.677037153  | 3.686168205  | -2.23167278  |
| H | 7.3360413    | 4.757787597  | -3.632798728 |
| H | 6.176484243  | 4.66041411   | -2.264554801 |
| H | -0.638417145 | -2.120197666 | -1.735468351 |
| H | 0.095201413  | -1.660954555 | -3.309096771 |
| H | 0.971475397  | -1.330201864 | -1.776625518 |

---



---

|   |              |              |              |
|---|--------------|--------------|--------------|
| H | -2.632308509 | 0.978894076  | -2.70413991  |
| H | -2.099101593 | -0.3024415   | -3.842070419 |
| H | -2.757731427 | -0.750134028 | -2.242906323 |
| H | -0.809399143 | 0.297336554  | -1.087506668 |
| H | -0.539652098 | 1.277002783  | -4.930258736 |
| H | 2.180030375  | 4.17035071   | -5.070436129 |
| H | 2.335297094  | 1.48674167   | -6.60019657  |
| H | 3.158336571  | 3.015278331  | -7.061947939 |
| H | 3.618530666  | 2.162342631  | -5.55011695  |
| H | -0.236140127 | 4.227494265  | -5.817830636 |
| H | 0.905033536  | 4.25527499   | -7.203713069 |
| H | 0.03538302   | 2.748686509  | -6.795054888 |
| H | -3.138249394 | 3.859440479  | -1.368552359 |
| H | -2.009524558 | 5.080373638  | -2.043618644 |
| H | -1.544854134 | 3.347748633  | -2.019883294 |
| H | -1.678764446 | 5.652267177  | 1.700851772  |
| H | -2.015552409 | 6.445240748  | 0.12595938   |
| H | -3.205481084 | 5.31152974   | 0.828120866  |
| H | -0.367572729 | 4.593682903  | -0.199587579 |
| H | -3.431670866 | 3.049164319  | 1.870353366  |
| H | -1.958368508 | -0.585584031 | 2.999713874  |
| H | -4.745546853 | 0.677966896  | 2.519487144  |
| H | -3.983331757 | -0.588764764 | 1.506267855  |
| H | -4.431175059 | -0.945974299 | 3.208266591  |
| H | -1.676959845 | 1.137778315  | 4.806061054  |
| H | -3.344881396 | 1.728587327  | 4.519558035  |
| H | -3.079048152 | 0.068447875  | 5.145142235  |
| H | 3.505247264  | 3.965043589  | -3.443683831 |

---

**Table S8.** Cartesian coordinates (Å) for DFT energy minimized (for hydrogen atoms only) blue isomer of [Mn<sup>III</sup>(O<sub>2</sub>)(Tp<sup>iPr2</sup>)(pz<sup>iPr2</sup>H)] (193 K structure).

| Atom | x            | y            | z            |
|------|--------------|--------------|--------------|
| Mn   | -0.143372466 | 0.009476672  | 0.09138829   |
| O    | 1.706896913  | -0.144021844 | 0.019318459  |
| O    | 1.308922384  | 1.249699234  | 0.073251099  |
| N    | -2.007420749 | 0.919261156  | 0.150692529  |
| N    | -3.066550209 | 0.247068582  | -0.414283184 |
| N    | -0.644228416 | -0.205138617 | -2.125270207 |
| N    | -1.861327267 | -0.780887533 | -2.393729509 |
| N    | -0.90512222  | -1.904881998 | 0.249909592  |
| N    | -2.152205259 | -2.146080069 | -0.27455667  |
| N    | 0.071423721  | 0.251332125  | 2.576980067  |
| N    | 1.187791979  | 0.991341553  | 2.79418746   |
| B    | -2.815458843 | -1.077874653 | -1.203849824 |
| C    | -2.234183199 | 3.950310133  | 2.332716817  |
| C    | -0.975629283 | 4.054246186  | 0.120825321  |
| C    | -1.545870888 | 3.134686476  | 1.224844449  |
| C    | -2.469881989 | 2.100121146  | 0.62541067   |
| C    | -3.856638813 | 2.180212658  | 0.376872469  |
| C    | -4.206231117 | 0.993863378  | -0.285223256 |
| C    | -5.555850774 | 0.572582729  | -0.82225487  |
| C    | -6.699403168 | 1.026069567  | 0.103704497  |
| C    | -5.764803916 | 1.091301606  | -2.262593478 |
| C    | 1.438787853  | 1.723622858  | -4.391274078 |
| C    | 2.436011719  | -0.508732232 | -3.677426094 |
| C    | 1.375595084  | 0.569742544  | -3.371217116 |
| C    | -0.008860766 | -0.033524927 | -3.301988384 |
| C    | -0.83309734  | -0.507868816 | -4.352888696 |
| C    | -2.003519799 | -0.980214923 | -3.744956257 |
| C    | -3.199925109 | -1.656032307 | -4.377347755 |
| C    | -3.532789644 | -1.051657707 | -5.753676619 |
| C    | -2.981349648 | -3.182688953 | -4.479576319 |
| C    | 0.951502741  | -4.124308839 | 2.636529614  |
| C    | 1.937902843  | -3.525637186 | 0.36871249   |
| C    | 0.906235871  | -3.142073229 | 1.454153984  |
| C    | -0.477225237 | -3.038465804 | 0.85476914   |
| C    | -1.479880875 | -4.024192941 | 0.729843954  |
| C    | -2.528299182 | -3.430663068 | 0.009368346  |
| C    | -3.876263284 | -4.008619788 | -0.360549115 |
| C    | -4.960654998 | -3.571421527 | 0.649851318  |
| C    | -3.821409896 | -5.540821754 | -0.487208961 |

---

|   |              |              |              |
|---|--------------|--------------|--------------|
| C | -2.899932317 | 0.00483887   | 3.982160126  |
| C | -1.599705832 | -1.777946001 | 5.239648955  |
| C | -1.647673218 | -0.89925148  | 3.977280204  |
| C | -0.381877585 | -0.086464447 | 3.805816604  |
| C | 0.473748946  | 0.455826717  | 4.803033797  |
| C | 1.479590737  | 1.148716462  | 4.111948863  |
| C | 2.671416328  | 1.948325936  | 4.584388108  |
| C | 2.232287184  | 3.259018422  | 5.271962664  |
| C | 3.585657491  | 1.110191665  | 5.500279008  |
| H | 1.642297895  | 1.350763682  | 1.931412503  |
| H | -2.634722043 | 3.296277974  | 3.133003578  |
| H | -1.515756354 | 4.656932597  | 2.795697512  |
| H | -3.075229071 | 4.553225411  | 1.930073276  |
| H | -1.785969077 | 4.627950357  | -0.375891207 |
| H | -0.256627198 | 4.781116931  | 0.55267445   |
| H | -0.443623962 | 3.467233881  | -0.653771718 |
| H | -0.696682853 | 2.579980708  | 1.67521757   |
| H | -4.528748247 | 3.000246669  | 0.647262771  |
| H | -5.565921908 | -0.536660571 | -0.859579729 |
| H | -6.563213601 | 0.647912476  | 1.136790204  |
| H | -6.767659544 | 2.13271873   | 0.152758274  |
| H | -7.672530247 | 0.652218633  | -0.274921897 |
| H | -5.769144986 | 2.200800164  | -2.285035942 |
| H | -4.957178045 | 0.74538577   | -2.938120406 |
| H | -6.733047626 | 0.735042294  | -2.671126294 |
| H | 0.69493431   | 2.512562775  | -4.158803521 |
| H | 2.445304829  | 2.19103994   | -4.388494136 |
| H | 1.24109614   | 1.365823849  | -5.424176116 |
| H | 2.265556474  | -0.971398676 | -4.672918417 |
| H | 3.454473221  | -0.06724732  | -3.677681986 |
| H | 2.415029547  | -1.313714893 | -2.916296078 |
| H | 1.589124841  | 0.981534947  | -2.363099017 |
| H | -0.608067946 | -0.50553306  | -5.424571869 |
| H | -4.071481059 | -1.487029809 | -3.710301795 |
| H | -3.699013953 | 0.042543413  | -5.689571611 |
| H | -2.713186176 | -1.227520054 | -6.481146386 |
| H | -4.449777948 | -1.516494573 | -6.170324485 |
| H | -3.881203069 | -3.683391745 | -4.893891127 |
| H | -2.122930054 | -3.412437323 | -5.144344338 |
| H | -2.764620463 | -3.62864589  | -3.4880798   |
| H | 0.7363651    | -5.163579847 | 2.309632518  |
| H | 1.960025357  | -4.12652275  | 3.097460542  |
| H | 0.216913837  | -3.85666273  | 3.422441432  |

---

---

|   |              |              |              |
|---|--------------|--------------|--------------|
| H | 1.929410727  | -2.795962    | -0.464632738 |
| H | 2.961523647  | -3.543346885 | 0.796531975  |
| H | 1.721210704  | -4.531914929 | -0.047573786 |
| H | 1.170355908  | -2.127817054 | 1.82310785   |
| H | -1.44819936  | -5.048506397 | 1.112671182  |
| H | -4.156468191 | -3.592511168 | -1.351499587 |
| H | -4.731930461 | -3.959484316 | 1.664036056  |
| H | -5.028043313 | -2.467375544 | 0.718832698  |
| H | -5.95565304  | -3.959644463 | 0.348934758  |
| H | -4.801070695 | -5.93387129  | -0.826585447 |
| H | -3.050170179 | -5.864500343 | -1.214694864 |
| H | -3.59319603  | -6.020198348 | 0.487507954  |
| H | -2.875649786 | 0.710221637  | 4.839585283  |
| H | -2.970027167 | 0.598243982  | 3.049223954  |
| H | -3.823404531 | -0.604932993 | 4.070024165  |
| H | -2.497353059 | -2.426853918 | 5.298091824  |
| H | -0.702779028 | -2.42984462  | 5.253961722  |
| H | -1.580896907 | -1.159301256 | 6.161701865  |
| H | -1.718044546 | -1.564759008 | 3.089647958  |
| H | 0.378550771  | 0.353144636  | 5.889178733  |
| H | 3.253681842  | 2.221233327  | 3.676522427  |
| H | 1.638067565  | 3.049162139  | 6.185593365  |
| H | 3.116488202  | 3.858907736  | 5.571652833  |
| H | 1.608543577  | 3.879858774  | 4.59804484   |
| H | 3.929861321  | 0.186437158  | 4.993602279  |
| H | 4.480142711  | 1.694276112  | 5.799784133  |
| H | 3.053114595  | 0.811555136  | 6.427278862  |
| H | -3.86385969  | -1.505101017 | -1.607867231 |

---

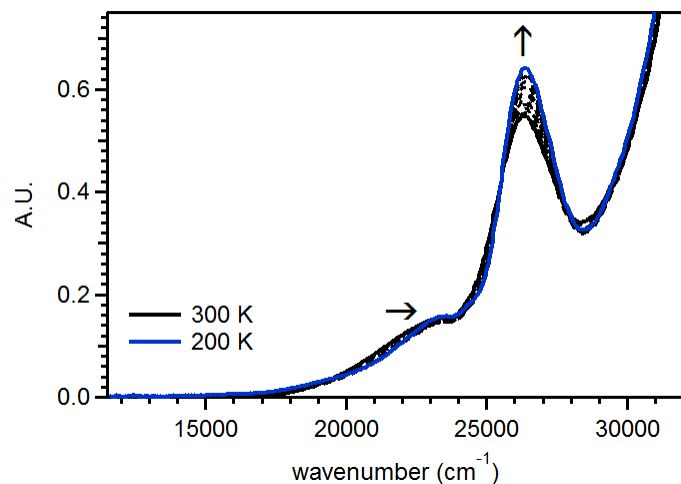

**Figure S1.** Variable-temperature absorption data collected for  $[\text{Mn}^{\text{III}}(\text{O}_2)(\text{Tp}^{\text{Ph}_2})](\text{THF})$  in THF. Data were collected from 300 – 200 K in 10 K increments.

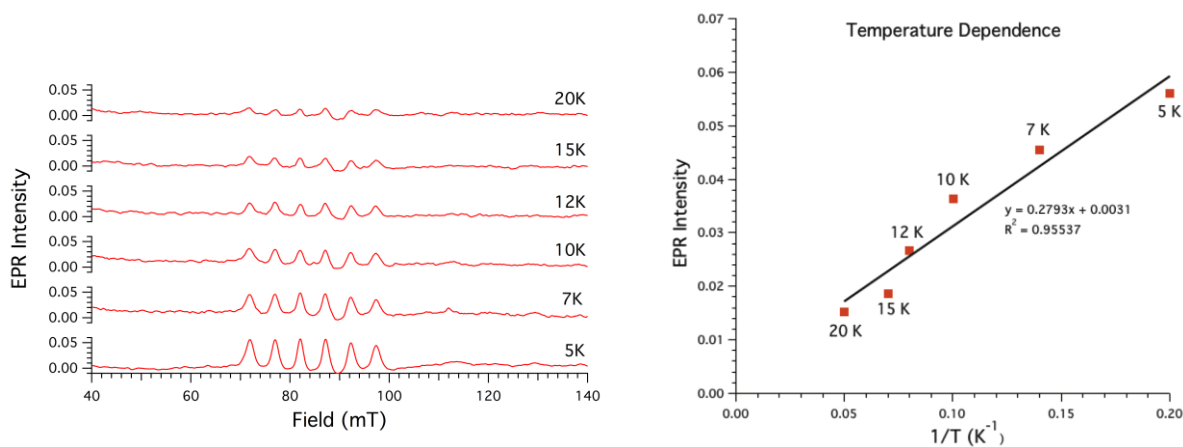

**Figure S2.** Variable-temperature parallel-mode EPR spectra collected for  $[\text{Mn}^{\text{III}}(\text{O}_2)(\text{Tp}^{\text{Ph}_2})]$ .

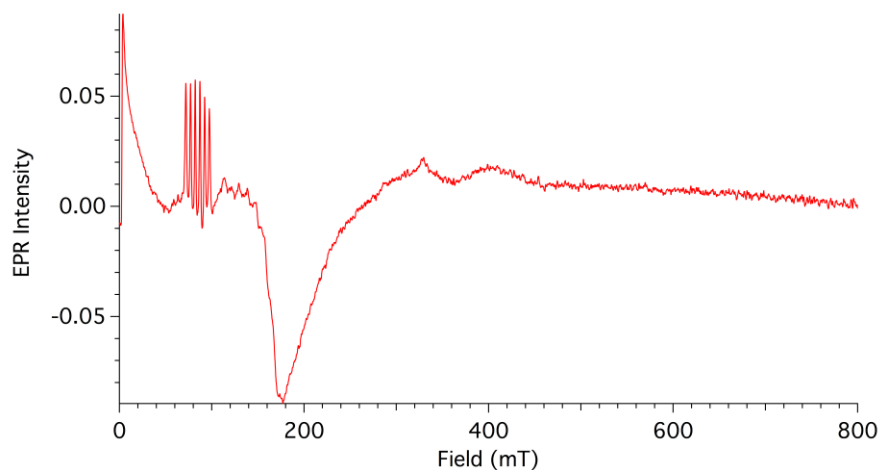

**Figure S3.** Full spectrum, parallel-mode X-band EPR of  $[\text{Mn}^{\text{III}}(\text{O}_2)(\text{Tp}^{\text{Ph}_2})]$ . The large negative feature from 100 to 250 mT is due to  $\text{O}_2$  dissolved in THF solution.

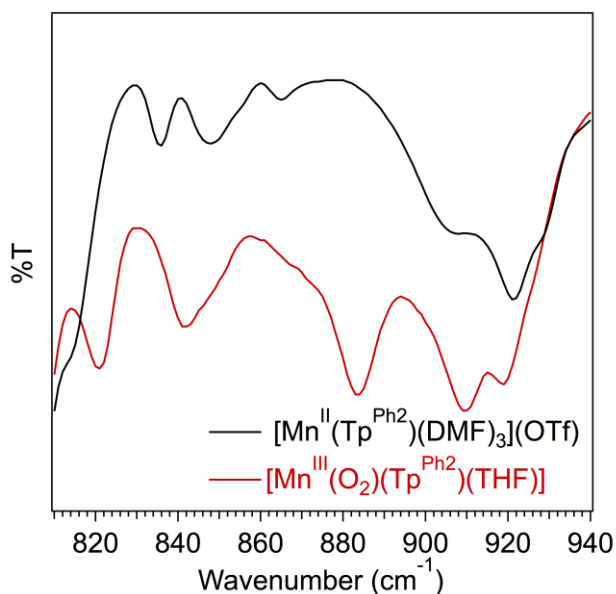

**Figure S4.** IR spectrum of  $[\text{Mn}^{\text{II}}(\text{Tp}^{\text{Ph}_2})(\text{DMF})_3](\text{OTf})$  (black) and  $[\text{Mn}^{\text{III}}(\text{O}_2)(\text{Tp}^{\text{Ph}_2})](\text{THF})$  (red) with a weak feature at  $882\text{ cm}^{-1}$ .

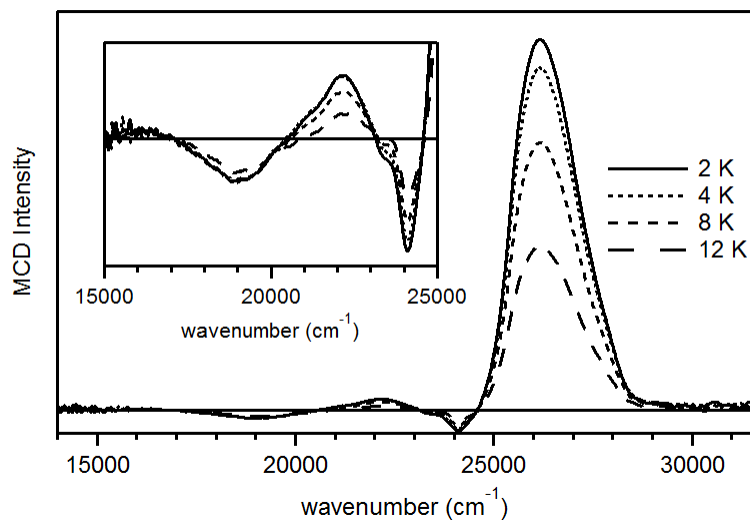

**Figure S5.** Variable-temperature 7 T MCD data collected for  $[\text{Mn}^{\text{III}}(\text{O}_2)(\text{Tp}^{\text{Ph}_2})](\text{THF})$  in THF. Inset: expanded view of low-intensity MCD features from  $15\ 000 - 25\ 000\text{ cm}^{-1}$ . Data were collected at the temperatures indicated in the figure.

**Table S9.** Electronic transition energies ( $\text{cm}^{-1}$ ), oscillator strengths ( $f_{exp}$ ), and bandwidths (fwhm;  $\text{cm}^{-1}$ ) from Gaussian deconvolutions of 298 K absorption and 2 K, 7 T MCD data of  $[\text{Mn}^{\text{III}}(\text{O}_2)(\text{Tp}^{\text{Ph}_2})(\text{THF})]$ :

| band | energy      | $f_{exp} \times 10^3$ | fwhm      |
|------|-------------|-----------------------|-----------|
| 1    | Abs: 19 000 | 0.083                 | Abs: 2248 |
|      | MCD: 19 000 |                       | MCD: 1998 |
| 2    | Abs: 20 890 | 0.135                 | Abs: 2248 |
|      | MCD: 21 455 |                       | MCD: 1665 |
| 3    | Abs: 22 600 | 0.290                 | Abs: 2248 |
|      | MCD: 22 325 |                       | MCD: 1665 |
| 4    | Abs: NA     |                       | Abs: NA   |
|      | MCD: 23 675 |                       | MCD: 500  |
| 5    | Abs: 24 350 | 0.342                 | Abs: 2248 |
|      | MCD: 24 800 |                       | MCD: 1832 |
| 6    | Abs: NA     |                       | Abs: NA   |
|      | MCD: 25 150 |                       | MCD: 666  |
| 7    | Abs: 26 300 | 167.64                | Abs: 2331 |
|      | MCD: 26 060 |                       | MCD: 1832 |
| 8    | Abs: 28 400 | 83.28                 | Abs: 2331 |
|      | MCD: 27 609 |                       | MCD: 1832 |
| 9    | Abs: NA     |                       | Abs: NA   |
|      | MCD: 28 350 |                       | MCD: 999  |

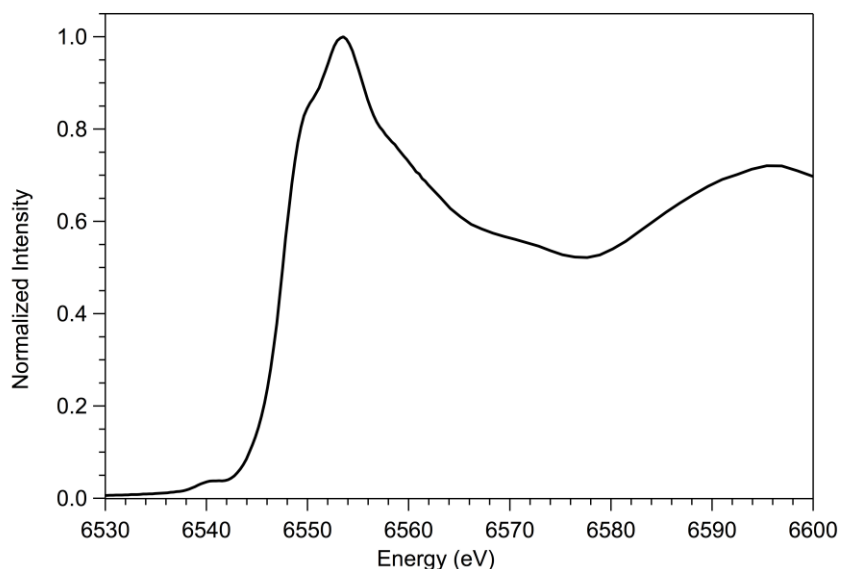

**Figure S6.** Mn K-edge X-ray Absorption data of  $[\text{Mn}^{\text{II}}(\text{Tp}^{\text{Ph}_2})(\text{DMF})_3](\text{OTf})$  with an edge at 6547.5 eV and a pre-edge feature at 6540.6 eV.

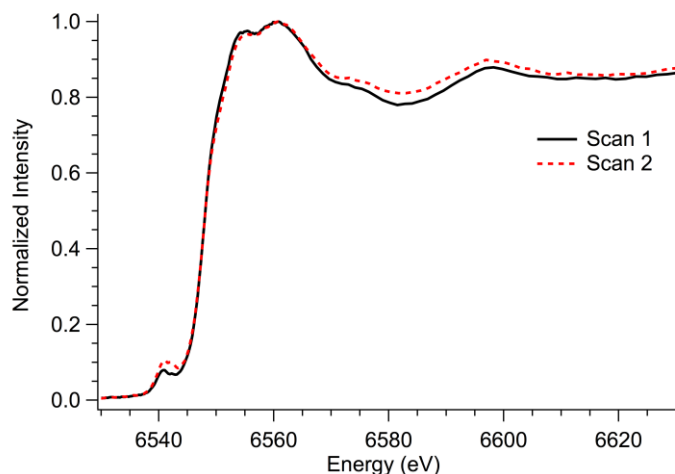

**Figure S7.** Mn K-edge X-ray Absorption data of  $[\text{Mn}^{\text{III}}(\text{O}_2)(\text{Tp}^{\text{Ph}_2})(\text{THF})]$  with change in pre-edge feature from scan 1 to scan 2.

**Table S10.** Comparison of Mn-Ligand Bond Lengths from X-ray Diffraction (XRD) and EXAFS fits for  $[\text{Mn}^{\text{II}}(\text{Tp}^{\text{Ph}_2})(\text{DMF})_3](\text{OTf})$ .

|         | XRD (Å)  | EXAFS (Å) |
|---------|----------|-----------|
| Mn-N(1) | 2.286(1) | 2.28      |
| Mn-N(2) | 2.250(3) | 2.28      |
| Mn-N(3) | 2.319(1) | 2.28      |
| Mn-O(1) | 2.157(3) | 2.14      |
| Mn-O(2) | 2.141(6) | 2.14      |
| Mn-O(3) | 2.191(1) | 2.14      |

**Table S11.** All EXAFS Fitting Results for  $[\text{Mn}^{\text{II}}(\text{Tp}^{\text{Ph}_2})(\text{DMF})_3](\text{OTf})$ .

| fit | Mn-O |      |            | Mn-N |      |            | Mn-N/C |      |            | Mn-B |      |            | Mn-C |      |            | F-factor |
|-----|------|------|------------|------|------|------------|--------|------|------------|------|------|------------|------|------|------------|----------|
|     | n    | r(Å) | $\sigma^2$ | n    | r(Å) | $\sigma^2$ | n      | r(Å) | $\sigma^2$ | n    | r(Å) | $\sigma^2$ | n    | r(Å) | $\sigma^2$ |          |
| 1   | 6    | 2.18 | 7.41       |      |      |            |        |      |            |      |      |            |      |      |            | 0.612    |
| 2   | 3    | 2.14 | 3.29       | 3    | 2.26 | 2.58       |        |      |            |      |      |            |      |      |            | 0.598    |
| 3   | 3    | 2.14 | 3.53       | 3    | 2.26 | 2.84       | 5      | 3.10 | 3.14       |      |      |            |      |      |            | 0.552    |
| 4   | 3    | 2.14 | 3.44       | 3    | 2.26 | 2.87       | 6      | 3.10 | 4.72       |      |      |            |      |      |            | 0.558    |
| 5   | 3    | 2.14 | 3.44       | 3    | 2.27 | 2.26       | 5      | 3.18 | 8.15       | 1    | 3.11 | -4.40      |      |      |            | 0.520    |
| 6   | 3    | 2.17 | 7.16       | 3    | 2.23 | 5.20       | 5      | 3.19 | 8.63       | 1    | 3.08 | -3.80      |      |      |            | 0.526    |
| 7   | 3    | 2.14 | 3.86       | 3    | 2.26 | 2.78       | 5      | 3.09 |            |      |      |            | 6    | 3.18 | -2.90      | 0.536    |
| 8   | 3    | 2.14 | 3.68       | 3    | 2.26 | 2.69       | 5      | 3.09 | 2.95       |      |      |            | 6    | 3.70 | 15.78      | 0.549    |
| 9   | 3    | 2.16 | 3.75       | 3    | 2.27 | 3.68       | 5      | 3.08 | 3.32       | 1    | 3.33 | 4.54       |      |      |            | 0.551    |
| 10  | 3    | 2.16 | 3.88       | 3    | 2.27 | 3.53       | 3      | 3.08 | 0.60       | 1    | 3.30 | 6.05       |      |      |            | 0.535    |
| 11  | 3    | 2.15 | 3.48       | 3    | 2.28 | 3.09       | 3      | 3.08 | 1.15       | 1    | 3.33 | 7.59       | 1    | 3.53 | -1.70      | 0.528    |
| 12  | 3    | 2.16 | 3.62       | 3    | 2.28 | 3.59       | 3      | 3.08 | 0.67       | 1    | 3.31 | 5.03       | 6    | 3.54 | 22.79      | 0.532    |
| 13  | 3    | 2.15 | 3.39       | 3    | 2.28 | 2.98       | 3      | 3.09 | 0.61       | 1    | 3.31 | 3.69       | 6    | 3.50 | 7.43       | 0.531    |
| 14  | 3    | 2.16 | 3.31       | 3    | 2.28 | 3.17       | 6      | 3.10 | 5.11       | 1    | 3.35 | 1.61       | 6    | 3.51 | 2.66       | 0.540    |
| 15  | 3    | 2.16 | 3.42       | 3    | 2.28 | 3.17       | 4      | 3.09 | 2.09       | 1    | 3.33 | 2.40       | 6    | 3.49 | 5.51       | 0.534    |



**Table S12.** Energies (eV) and Compositions (%) of the O 2p-based MOs and the Mn 3d-based MOs Based on Spin-Unrestricted B3LYP DFT Computations for  $[\text{Mn}^{\text{III}}(\text{O}_2)(\text{Tp}^{\text{Ph}_2})(\text{THF})]$ .

| orbital                                                                                  | occup | spin | energy | Mn 3d | O <sub>2</sub> 2p | N 2p | O <sub>THF</sub> 2p |
|------------------------------------------------------------------------------------------|-------|------|--------|-------|-------------------|------|---------------------|
| 193 (Mn xz)                                                                              | 1.0   | ↑    | -8.662 | 71.2  | 2.0               | 5.4  | 1.0                 |
| 195 (Mn xy/x <sup>2</sup> -y <sup>2</sup> )                                              | 1.0   | ↑    | -7.942 | 23.3  | 8.6               | 11.9 | 0.5                 |
| 197 (Mn x <sup>2</sup> -y <sup>2</sup> /Tp <sup>Ph<sub>2</sub></sup> )                   | 1.0   | ↑    | -7.630 | 12.8  | 3.4               | 17.5 | 0.2                 |
| 199 (Mn yz/O <sub>2</sub> π <sub>op</sub> <sup>*</sup> )                                 | 1.0   | ↑    | -7.512 | 53.4  | 26.1              | 4.6  | 4.3                 |
| 200 (Mn x <sup>2</sup> -y <sup>2</sup> /Tp <sup>Ph<sub>2</sub></sup> )                   | 1.0   | ↑    | -7.403 | 12.2  | 4.3               | 14.3 | 0.0                 |
| 201 (Mn xy/x <sup>2</sup> -y <sup>2</sup> /O <sub>2</sub> π <sub>op</sub> <sup>*</sup> ) | 1.0   | ↑    | -7.265 | 21.8  | 16.7              | 9.0  | 12.0                |
| 213 (Tp <sup>Ph<sub>2</sub></sup> )                                                      | 1.0   | ↑    | -6.297 | 2.1   | 0.9               | 24.9 | 0.2                 |
| 214 (Mn z <sup>2</sup> /Tp <sup>Ph<sub>2</sub></sup> )                                   | 1.0   | ↑    | -6.149 | 18.5  | 3.7               | 17.8 | 1.5                 |
| 215 (Mn z <sup>2</sup> /Tp <sup>Ph<sub>2</sub></sup> )                                   | 1.0   | ↑    | -6.059 | 21.4  | 3.0               | 22.5 | 1.6                 |
| 216 (Tp <sup>Ph<sub>2</sub></sup> )                                                      | 1.0   | ↑    | -5.803 | 0.4   | 0.2               | 22.2 | 0.0                 |
| 217 (O <sub>2</sub> π <sub>op</sub> <sup>*</sup> )                                       | 1.0   | ↑    | -5.018 | 4.0   | 92.9              | 0.0  | 0.0                 |
| 218 (Mn xy/O <sub>2</sub> π <sub>op</sub> <sup>*</sup> )                                 | 0.0   | ↑    | -1.582 | 34.0  | 52.1              | 4.7  | 0.0                 |
| 213 (O <sub>2</sub> π <sup>*</sup> )                                                     | 1.0   | ↓    | -5.141 | 5.4   | 88.8              | 0.7  | 0.2                 |
| 214 (Mn yz/xy)                                                                           | 0.0   | ↓    | -1.295 | 17.7  | 0.8               | 20.5 | 0.0                 |
| 215 (Mn xz)                                                                              | 0.0   | ↓    | -1.236 | 19.0  | 2.0               | 18.8 | 0.2                 |
| 218 (Tp <sup>Ph<sub>2</sub></sup> )                                                      | 0.0   | ↓    | -0.654 | 1.5   | 0.0               | 10.0 | 0.0                 |
| 219 (Mn x <sup>2</sup> -y <sup>2</sup> /xy)                                              | 0.0   | ↓    | -0.614 | 51.9  | 2.7               | 2.7  | 0.0                 |
| 221 (Mn xz/Tp <sup>Ph<sub>2</sub></sup> )                                                | 0.0   | ↓    | -0.406 | 24.0  | 2.0               | 19.0 | 0.1                 |
| 224 (Mn yz)                                                                              | 0.0   | ↓    | -0.239 | 24.0  | 0.7               | 2.6  | 0.0                 |
| 225 (Mn z <sup>2</sup> )                                                                 | 0.0   | ↓    | -0.180 | 48.6  | 1.7               | 2.5  | 0.0                 |

**Table S13.** TD-DFT Calculated Energies, Percent Contributions from Dominant One-electron Excitations, and Oscillator Strengths for the Major Electronic Transitions of  $[\text{Mn}^{\text{III}}(\text{O}_2)(\text{Tp}^{\text{Ph}_2})]$ .

| region | state  | energy<br>( $\text{cm}^{-1}$ ) | $f_{osc}$                       | transition                        | %                  | donor<br>MO                   | acceptor MO                              | comments                                              | EDDM |
|--------|--------|--------------------------------|---------------------------------|-----------------------------------|--------------------|-------------------------------|------------------------------------------|-------------------------------------------------------|------|
| A      | 1      | 10 000                         | 0.000011                        | $217\alpha \rightarrow 218\alpha$ | 96                 | $\text{O}_2 \pi^*$            | $\text{O}_2 \pi^* / \text{Mn } d_{xy}$   | $\text{O}_2 \rightarrow \text{Mn}$<br>CT              |      |
|        | 2      | 20 500                         | 0.000326                        | $215\alpha \rightarrow 218\alpha$ | 41                 | $\text{Mn } d_z^2$            | $\text{O}_2 \pi^* / \text{Mn } d_{xy}$   | Mn d→d                                                |      |
|        |        |                                |                                 | $214\alpha \rightarrow 218\alpha$ | 32                 | $\text{Mn } d_z^2$            | $\text{O}_2 \pi^* / \text{Mn } d_{xy}$   |                                                       |      |
|        | 3      | 23 000                         | 0.000251                        | $213\beta \rightarrow 214\beta$   | 58                 | $\text{O}_2 \pi^*$            | $\text{Mn } d_{xy} / d_{yz}$             | $\text{O}_2 \rightarrow \text{Mn}$<br>CT              |      |
|        | 4      | 23 300                         | 0.000841                        | $213\beta \rightarrow 215\beta$   | 58                 | $\text{O}_2 \pi^*$            | $\text{Mn } d_{xz}$                      | $\text{O}_2 \rightarrow \text{Mn}$<br>CT              |      |
| 5      | 25 500 | 0.000497                       | $213\beta \rightarrow 219\beta$ | 46                                | $\text{O}_2 \pi^*$ | $\text{Mn } x^2-y^2/xy$       | $\text{O}_2 \rightarrow \text{Mn}$<br>CT |                                                       |      |
| B      | 8      | 27 200                         | 0.000193                        | $199\alpha \rightarrow 218\alpha$ | 41                 | $\text{Mn } d_{yz}$           | $\text{O}_2 \pi^* / \text{Mn } d_{xy}$   | Mn d→d                                                |      |
|        |        |                                |                                 | $201\alpha \rightarrow 218\alpha$ | 11                 | $\text{Mn } d_x^2-y^2/d_{yz}$ | $\text{O}_2 \pi^* / \text{Mn } d_{xy}$   |                                                       |      |
|        |        |                                |                                 | $195\alpha \rightarrow 218\alpha$ | 3                  | $\text{Mn } d_x^2-y^2/d_{yz}$ | $\text{O}_2 \pi^* / \text{Mn } d_{xy}$   |                                                       |      |
| B      | 10     | 28 400                         | 0.003914                        | $216\alpha \rightarrow 218\alpha$ | 61                 | $\text{Tp}^{\text{Ph}_2}$     | $\text{O}_2 \pi^* / \text{Mn } d_{xy}$   | $\text{Tp}^{\text{Ph}_2} \rightarrow \text{Mn}$<br>CT |      |
|        |        |                                |                                 | $195\alpha \rightarrow 218\alpha$ | 5                  | $\text{Mn } d_x^2-y^2/d_{yz}$ | $\text{O}_2 \pi^* / \text{Mn } d_{xy}$   | Mn d→d                                                |      |
| B      | 12     | 28 800                         | 0.005577                        | $215\alpha \rightarrow 218\alpha$ | 8                  | $\text{Mn } d_z^2$            | $\text{O}_2 \pi^* / \text{Mn } d_{xy}$   | Mn d→d                                                |      |
|        |        |                                |                                 | $200\alpha \rightarrow 218\alpha$ | 8                  | $\text{Mn } d_x^2-y^2$        | $\text{O}_2 \pi^* / \text{Mn } d_{xy}$   |                                                       |      |
|        |        |                                |                                 | $199\alpha \rightarrow 218\alpha$ | 8                  | $\text{Mn } d_{yz}$           | $\text{O}_2 \pi^* / \text{Mn } d_{xy}$   |                                                       |      |
|        |        |                                |                                 | $197\alpha \rightarrow 218\alpha$ | 8                  | $\text{Mn } d_x^2-y^2$        | $\text{O}_2 \pi^* / \text{Mn } d_{xy}$   |                                                       |      |
|        |        |                                |                                 | $195\alpha \rightarrow 218\alpha$ | 6                  | $\text{Mn } d_x^2-y^2/d_{yz}$ | $\text{O}_2 \pi^* / \text{Mn } d_{xy}$   |                                                       |      |
| C      | 14     | 29 500                         | 0.003044                        | $213\beta \rightarrow 221\beta$   | 16                 | $\text{O}_2 \pi_{op}^*$       | $\text{Mn } d_{xz}$                      | $\text{O}_2 \rightarrow \text{Mn}$<br>CT              |      |
|        |        |                                |                                 | $213\beta \rightarrow 215\beta$   | 16                 | $\text{O}_2 \pi_{op}^*$       | $\text{Mn } d_{xz}$                      | $\text{O}_2 \rightarrow \text{Mn}$<br>CT              |      |
|        |        |                                |                                 | $213\beta \rightarrow 218\beta$   | 9                  | $\text{O}_2 \pi_{op}^*$       | $\text{Tp}^{\text{Ph}_2}$                | Mn d→d                                                |      |
|        |        |                                |                                 | $199\alpha \rightarrow 218\alpha$ | 5                  | $\text{Mn } d_{yz}$           | $\text{O}_2 \pi^* / \text{Mn } d_{xy}$   |                                                       |      |
| C      | 15     | 29 800                         | 0.003648                        | $213\beta \rightarrow 224\beta$   | 18                 | $\text{O}_2 \pi_{op}^*$       | $\text{Mn } d_{yz}$                      | $\text{O}_2 \rightarrow \text{Mn}$<br>CT              |      |

|   |    |        |          |                            |    |                                |                                            |                                         |                                                                                     |
|---|----|--------|----------|----------------------------|----|--------------------------------|--------------------------------------------|-----------------------------------------|-------------------------------------------------------------------------------------|
|   |    |        |          | 213 $\beta$ →225 $\beta$   | 17 | O <sub>2</sub> $\pi_{op}^*$    | Mn d <sub>z</sub> <sup>2</sup>             | O <sub>2</sub> →Mn<br>CT                |                                                                                     |
|   |    |        |          | 213 $\beta$ →218 $\beta$   | 8  | O <sub>2</sub> $\pi_{op}^*$    | Tr <sup>Ph2</sup>                          | O <sub>2</sub> →Tr <sup>Ph2</sup><br>CT |                                                                                     |
| B | 17 | 30 600 | 0.001215 | 215 $\alpha$ →218 $\alpha$ | 16 | Mn d <sub>z</sub> <sup>2</sup> | O <sub>2</sub> $\pi^*$ /Mn d <sub>xy</sub> | Mn d→d/<br>O <sub>2</sub>               | 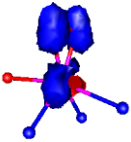 |
|   |    |        |          | 214 $\alpha$ →218 $\alpha$ | 8  | Mn d <sub>z</sub> <sup>2</sup> | O <sub>2</sub> $\pi^*$ /Mn d <sub>xy</sub> |                                         |                                                                                     |
|   |    |        |          | 193 $\alpha$ →218 $\alpha$ | 6  | Mn d <sub>xz</sub>             | O <sub>2</sub> $\pi^*$ /Mn d <sub>xy</sub> |                                         |                                                                                     |

<sup>a</sup>Electronic transition energies have been rounded to the nearest 100 cm<sup>-1</sup>. Included in this table are all Mn d-d transitions, as well as charge-transfer (CT) transitions, with  $f_{osc} > 0.003$ .

<sup>b</sup>Composition of molecular orbitals (MOs) involved in these electronic transitions are listed in Table S5. Spin-up and spin-down MOs are designated by  $\uparrow$  and  $\downarrow$ , respectively. <sup>c</sup>Electron density difference maps (EDDMs) showing surface contour plots of loss (red) and gain (blue) of electron density for a given electronic transition. For clarity, only the Mn, N, and O atoms are shown in these plots.

**Figure S8.** Calculation of  $\tau$  parameter for [Mn<sup>III</sup>(O<sub>2</sub>)(Tr<sup>Ph2</sup>)]. For clarity, only the primary coordination sphere of Mn, N, and O is shown.

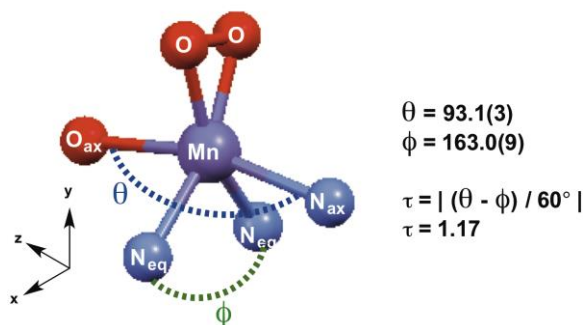

**Table S14.** Band comparison of the experimental absorption and MCD transition energies, TD-DFT and NEVPT2 calculated transition energies in wavenumbers.

| Band | Exp. Absorption  |                       | MCD              | TD-DFT           |                       | CASSCF/NEVPT2       |                       | Assignment             |
|------|------------------|-----------------------|------------------|------------------|-----------------------|---------------------|-----------------------|------------------------|
|      | cm <sup>-1</sup> | $f_{exp} \times 10^3$ | cm <sup>-1</sup> | cm <sup>-1</sup> | $f_{osc} \times 10^3$ | cm <sup>-1</sup>    | $f_{osc} \times 10^3$ |                        |
| 1    | 19 000           | 0.083                 | 19 000           | 20 500           | 0.326                 | 25 700              | 0.164                 | $d_z^2 - d_{xy}$       |
| 2    | 20 890           | 0.135                 | 21 455           | 23 300           | 0.841                 | -                   | -                     | CT                     |
| 3    | 22 600           | 0.290                 | 22 325           | 27 200           | 0.193                 | 29 500              | 0.448                 | $d_{yz} - d_{xy}$      |
| 4    | <sup>b</sup>     | -                     | 23 675           | <sup>c</sup>     | -                     | 26 800 <sup>a</sup> | 0.000                 | SF <sup>c</sup>        |
| 5    | 24 350           | 34.20                 | 24 800           | 28 800           | 5.577                 | 31 600              | 0.198                 | $d_{x^2-y^2} - d_{xy}$ |
| 6    | <sup>b</sup>     | -                     | 25 150           | <sup>c</sup>     | -                     | 30 500 <sup>a</sup> | -                     | SF <sup>c</sup>        |
| 7    | 26 300           | 167.64                | 26 060           | 30 600           | 1.215                 | 32 000              | 0.005                 | $d_{xz} - d_{xy}$      |
| 8    | 28 400           | 83.28                 | 27 609           | 29 500           | 3.044                 | -                   | -                     | O <sub>2</sub> -Mn CT  |
| 9    | 28 350           | -                     | -                | 29 800           | 3.648                 | -                   | -                     | O <sub>2</sub> -Mn CT  |

<sup>a</sup>Indicates spin-forbidden states calculated by NEVPT2 with negligible contribution to the absorption spectrum. <sup>b</sup>Band only apparent in low-temperature, 7 T MCD spectrum. <sup>c</sup>Mn<sup>III</sup> spin-forbidden  $d-d$  transitions to triplet excited states.

**Table S15.** CASSCF/NEVPT2 calculated individual contributions to zero field splitting parameters. ( $D = -2.905 \text{ cm}^{-1}$ ,  $E/D = 0.275$ )

| Multiplicity | Root | Energy (cm <sup>-1</sup> ) | $D$ (cm <sup>-1</sup> ) | $E$    |
|--------------|------|----------------------------|-------------------------|--------|
| 5            | 1    | 25688.2                    | -0.368                  | 0.006  |
| 5            | 2    | 29493.3                    | -0.489                  | -0.005 |
| 5            | 3    | 32046.6                    | 0.001                   | -0.037 |
| 5            | 4    | 31593.8                    | 0.095                   | 0.030  |
| 3            | 0    | 18355.4                    | -0.473                  | -0.035 |
| 3            | 1    | 19212.3                    | -0.337                  | 0.017  |
| 3            | 2    | 20430.1                    | -0.014                  | 0.002  |
| 3            | 3    | 22931.6                    | 0.000                   | 0.000  |
| 3            | 4    | 23652.4                    | -0.264                  | -0.006 |
| 3            | 5    | 23690.7                    | -0.011                  | 0.005  |
| 3            | 6    | 25183.4                    | -0.113                  | 0.037  |
| 3            | 7    | 24935.5                    | -0.145                  | -0.023 |
| 3            | 8    | 26826.9                    | -0.003                  | -0.002 |
| 3            | 9    | 30521.8                    | -0.784                  | -0.788 |

**Table S16.** Energies (eV) and Compositions (%) of the O 2p-based MOs and the Mn 3d-based MOs Based on Spin-Unrestricted B3LYP DFT Computations for [Mn<sup>III</sup>(O<sub>2</sub>)(Ph<sup>iPr<sub>2</sub></sup>)(pz<sup>iPr<sub>2</sub></sup>H)] (193 K) from XRD coordinates.

| orbital | occupancy | spin | energy (eV) | Mn 3d | O (2p) |
|---------|-----------|------|-------------|-------|--------|
| 186     | 1.0       | ↑    | -6.4209     | 6.6   | 3.7    |
| 187     | 1.0       | ↑    | -6.3665     | 12.1  | 4.6    |
| 188     | 1.0       | ↑    | -6.1353     | 1.0   | 0.6    |
| 189     | 1.0       | ↑    | -6.0422     | 0.7   | 0.3    |
| 190     | 1.0       | ↑    | -5.4246     | 51.6  | 6.8    |
| 191     | 1.0       | ↑    | -5.0085     | 5.8   | 65.2   |
| 192     | 0.0       | ↑    | -1.0234     | 45.5  | 44.5   |
|         |           |      |             |       |        |
| 186     | 1.0       | ↓    | -6.0434     | 0.2   | 0.4    |
| 187     | 1.0       | ↓    | -5.1158     | 5.2   | 88.6   |
| 188     | 0.0       | ↓    | -0.6623     | 56.8  | 3.4    |
| 189     | 0.0       | ↓    | -0.6169     | 61.3  | 2.9    |
| 190     | 0.0       | ↓    | -0.2795     | 75.1  | 3.1    |
| 191     | 0.0       | ↓    | 0.3637      | 0.7   | 0.6    |

**Table S17.** Energies (eV) and Compositions (%) of the O 2p-based MOs and the Mn 3d-based MOs Based on Spin-Unrestricted B3LYP DFT Computations for [Mn<sup>III</sup>(O<sub>2</sub>)(Ph<sup>iPr<sub>2</sub></sup>)(pz<sup>iPr<sub>2</sub></sup>H)] (193 K) from hydrogen optimized DFT structures.

| orbital | occupancy | spin | energy (eV) | Mn 3d | O (2p) |
|---------|-----------|------|-------------|-------|--------|
| 186     | 1.0       | ↑    | -6.5581     | 3.9   | 3.1    |
| 187     | 1.0       | ↑    | -6.5183     | 9.9   | 4.3    |
| 188     | 1.0       | ↑    | -6.2916     | 1.0   | 0.5    |
| 189     | 1.0       | ↑    | -6.1642     | 0.6   | 0.2    |
| 190     | 1.0       | ↑    | -5.6258     | 49.4  | 6.8    |
| 191     | 1.0       | ↑    | -5.2261     | 5.4   | 90.6   |
| 192     | 0.0       | ↑    | -1.2706     | 43.3  | 46.5   |
|         |           |      |             |       |        |
| 186     | 1.0       | ↓    | -6.1651     | 0.1   | 0.6    |
| 187     | 1.0       | ↓    | -5.3378     | 4.5   | 88.2   |
| 188     | 0.0       | ↓    | -0.8139     | 62.6  | 2.6    |
| 189     | 0.0       | ↓    | -0.7628     | 61.0  | 4.2    |
| 190     | 0.0       | ↓    | -0.4787     | 73.9  | 4.0    |
| 191     | 0.0       | ↓    | 0.2707      | 2.6   | 0.6    |

**Table S18.** Energies (eV) and Compositions (%) of the O 2p-based MOs and the Mn 3d-based MOs Based on Spin-Unrestricted B3LYP DFT Computations for [Mn<sup>III</sup>(O<sub>2</sub>)(Ph<sup>iPr<sub>2</sub></sup>)(pz<sup>iPr<sub>2</sub></sup>H)] (253 K) from XRD coordinates.

| orbital | occupancy | spin | energy (eV) | Mn 3d | O 2p |
|---------|-----------|------|-------------|-------|------|
| 186     | 1.0       | ↑    | -6.3618     | 13.4  | 5.1  |
| 187     | 1.0       | ↑    | -6.2663     | 6.4   | 3.8  |
| 188     | 1.0       | ↑    | -5.9808     | 1.0   | 0.3  |
| 189     | 1.0       | ↑    | -5.9184     | 0.8   | 0.3  |
| 190     | 1.0       | ↑    | -5.3902     | 51.3  | 6.5  |
| 191     | 1.0       | ↑    | -4.8770     | 6.2   | 91.9 |
| 192     | 0.0       | ↑    | -0.8555     | 45.0  | 44.4 |
|         |           |      |             |       |      |
| 186     | 1.0       | ↓    | -5.9202     | 0.1   | 0.5  |
| 187     | 1.0       | ↓    | -4.9824     | 5.9   | 89.0 |
| 188     | 0.0       | ↓    | -0.5594     | 52.5  | 4.9  |
| 189     | 0.0       | ↓    | -0.4820     | 61.5  | 3.4  |
| 190     | 0.0       | ↓    | -0.1782     | 70.6  | 4.1  |
| 191     | 0.0       | ↓    | 0.4323      | 1.9   | 0.5  |
| 192     | 0.0       | ↓    | 0.6041      | 38.2  | 0.7  |

**Table S19.** Energies (eV) and Compositions (%) of the O 2p-based MOs and the Mn 3d-based MOs Based on Spin-Unrestricted B3LYP DFT Computations for [Mn<sup>III</sup>(O<sub>2</sub>)(Ph<sup>iPr<sub>2</sub></sup>)(pz<sup>iPr<sub>2</sub></sup>H)] (253 K) from hydrogen optimized DFT structures.

| orbital | occupancy | spin | energy (eV) | Mn 3d | O 2p |
|---------|-----------|------|-------------|-------|------|
| 186     | 1.0       | ↑    | -6.5267     | 11.8  | 5.0  |
| 187     | 1.0       | ↑    | -6.4220     | 5.7   | 3.7  |
| 188     | 1.0       | ↑    | -6.1397     | 1.4   | 0.6  |
| 189     | 1.0       | ↑    | -6.1062     | 0.5   | 0.2  |
| 190     | 1.0       | ↑    | -5.5686     | 50.0  | 6.5  |
| 191     | 1.0       | ↑    | -4.9866     | 5.4   | 92.1 |
| 192     | 0.0       | ↑    | -1.0412     | 42.4  | 46.6 |
|         |           |      |             |       |      |
| 187     | 1.0       | ↓    | -5.0910     | 5.5   | 89.4 |
| 188     | 0.0       | ↓    | -0.6845     | 51.8  | 4.2  |
| 189     | 0.0       | ↓    | -0.6208     | 59.9  | 3.3  |
| 190     | 0.0       | ↓    | -0.3412     | 70.0  | 3.8  |
| 191     | 0.0       | ↓    | 0.2922      | 2.2   | 0.6  |

**Table S20.** TD-DFT Calculated Energies, Percent Contributions from Dominant One-electron Excitations, and Oscillator Strengths for the Major Electronic Transitions of  $[\text{Mn}^{\text{III}}(\text{O}_2)(\text{Ph}^{i\text{Pr}_2})(\text{pz}^{i\text{Pr}_2}\text{H})]$  (193 K) from XRD coordinates.

| band       | state   | energy<br>( $\text{cm}^{-1}$ ) | $f_{osc}$                       | transition                        | %            | donor<br>MO         | acceptor<br>MO      | comments          |
|------------|---------|--------------------------------|---------------------------------|-----------------------------------|--------------|---------------------|---------------------|-------------------|
| <i>i</i>   | 1       | 14969.5                        | 0.000049                        | $191\alpha \rightarrow 192\alpha$ | 98           | $\text{O}_2$        | Mn d / $\text{O}_2$ | LMCT              |
| <i>ii</i>  | 2       | 17339.6                        | 0.000664                        | $190\alpha \rightarrow 192\alpha$ | 96%          | Mn d                | Mn d / $\text{O}_2$ | d $\rightarrow$ d |
| <i>iii</i> | 3       | 24912.4                        | 0.000093                        | $187\beta \rightarrow 188\beta$   | 31           | $\text{O}_2$        | Mn d / $\text{O}_2$ | LMCT              |
|            |         |                                |                                 | $187\beta \rightarrow 189\beta$   | 52           | $\text{O}_2$        | Mn d / $\text{O}_2$ | LMCT              |
|            |         |                                |                                 | $187\beta \rightarrow 190\beta$   | 12           | $\text{O}_2$        | Mn d / $\text{O}_2$ | LMCT              |
| 4          | 25450.6 | 0.000505                       | $187\beta \rightarrow 188\beta$ | 50                                | $\text{O}_2$ | Mn d / $\text{O}_2$ | LMCT                |                   |
|            |         |                                | $187\beta \rightarrow 189\beta$ | 26                                | $\text{O}_2$ | Mn d / $\text{O}_2$ | LMCT                |                   |

**Table S21.** TD-DFT Calculated Energies, Percent Contributions from Dominant One-electron Excitations, and Oscillator Strengths for the Major Electronic Transitions of  $[\text{Mn}^{\text{III}}(\text{O}_2)(\text{Ph}^{i\text{Pr}_2})(\text{pz}^{i\text{Pr}_2}\text{H})]$  (193 K) from hydrogen optimized DFT structures.

| band       | state   | energy<br>( $\text{cm}^{-1}$ ) | $f_{osc}$                       | transition                        | %            | donor<br>MO  | acceptor<br>MO      | comments          |
|------------|---------|--------------------------------|---------------------------------|-----------------------------------|--------------|--------------|---------------------|-------------------|
| <i>i</i>   | 1       | 14583.9                        | 0.000053                        | $191\alpha \rightarrow 192\alpha$ | 98           | $\text{O}_2$ | Mn d / $\text{O}_2$ | LMCT              |
| <i>ii</i>  | 2       | 17466.1                        | 0.000808                        | $190\alpha \rightarrow 192\alpha$ | 95           | Mn d         | Mn d / $\text{O}_2$ | d $\rightarrow$ d |
| <i>iii</i> | 3       | 25165.9                        | 0.000022                        | $187\beta \rightarrow 188\beta$   | 58           | $\text{O}_2$ | Mn d                | LMCT              |
|            |         |                                |                                 | $187\beta \rightarrow 189\beta$   | 26           | $\text{O}_2$ | Mn d                | LMCT              |
|            |         |                                |                                 | $187\beta \rightarrow 190\beta$   | 11           | $\text{O}_2$ | Mn d                | LMCT              |
| 4          | 25939.3 | 0.000191                       | $187\beta \rightarrow 188\beta$ | 23                                | $\text{O}_2$ | Mn d         | LMCT                |                   |
|            |         |                                | $187\beta \rightarrow 189\beta$ | 50                                | $\text{O}_2$ | Mn d         | LMCT                |                   |

**Table S22.** TD-DFT Calculated Energies, Percent Contributions from Dominant One-electron Excitations, and Oscillator Strengths for the Major Electronic Transitions of  $[\text{Mn}^{\text{III}}(\text{O}_2)(\text{Ph}^{\text{iPr}_2})(\text{pz}^{\text{iPr}_2}\text{H})]$  (253 K) from XRD coordinates.

| band       | state   | energy<br>( $\text{cm}^{-1}$ ) | $f_{osc}$                       | transition                        | %            | donor<br>MO         | acceptor<br>MO      | comments          |
|------------|---------|--------------------------------|---------------------------------|-----------------------------------|--------------|---------------------|---------------------|-------------------|
| <i>i</i>   | 1       | 15091.5                        | 0.000032                        | $191\alpha \rightarrow 192\alpha$ | 98           | $\text{O}_2$        | Mn d / $\text{O}_2$ | LMCT              |
| <i>ii</i>  | 2       | 18475.4                        | 0.000670                        | $190\alpha \rightarrow 192\alpha$ | 95           | Mn d                | Mn d / $\text{O}_2$ | d $\rightarrow$ d |
| <i>iii</i> | 3       | 24717.0                        | 0.000170                        | $187\beta \rightarrow 188\beta$   | 26           | $\text{O}_2$        | Mn d / $\text{O}_2$ | LMCT              |
|            |         |                                |                                 | $187\beta \rightarrow 189\beta$   | 54           | $\text{O}_2$        | Mn d / $\text{O}_2$ | LMCT              |
|            |         |                                |                                 | $187\beta \rightarrow 190\beta$   | 1            | $\text{O}_2$        | Mn d / $\text{O}_2$ | LMCT              |
| 4          | 25274.5 | 0.000989                       | $187\beta \rightarrow 188\beta$ | 53                                | $\text{O}_2$ | Mn d / $\text{O}_2$ | LMCT                |                   |
|            |         |                                | $187\beta \rightarrow 189\beta$ | 25                                | $\text{O}_2$ | Mn d / $\text{O}_2$ | LMCT                |                   |

**Table S23.** TD-DFT Calculated Energies, Percent Contributions from Dominant One-electron Excitations, and Oscillator Strengths for the Major Electronic Transitions of  $[\text{Mn}^{\text{III}}(\text{O}_2)(\text{Ph}^{\text{iPr}_2})(\text{pz}^{\text{iPr}_2}\text{H})]$  (253 K) from hydrogen optimized DFT structures.

| band       | state   | energy<br>( $\text{cm}^{-1}$ ) | $f_{osc}$                       | transition                        | %            | donor<br>MO  | acceptor<br>MO      | comments          |
|------------|---------|--------------------------------|---------------------------------|-----------------------------------|--------------|--------------|---------------------|-------------------|
| <i>i</i>   | 1       | 14321.4                        | 0.000023                        | $191\alpha \rightarrow 192\alpha$ | 98           | $\text{O}_2$ | Mn d / $\text{O}_2$ | LMCT              |
| <i>ii</i>  | 2       | 18891.6                        | 0.000724                        | $190\alpha \rightarrow 192\alpha$ | 95           | Mn d         | Mn d / $\text{O}_2$ | d $\rightarrow$ d |
| <i>iii</i> | 3       | 24355.1                        | 0.000061                        | $187\beta \rightarrow 188\beta$   | 30           | $\text{O}_2$ | Mn d                | LMCT              |
|            |         |                                |                                 | $187\beta \rightarrow 189\beta$   | 47           | $\text{O}_2$ | Mn d                | LMCT              |
|            |         |                                |                                 | $187\beta \rightarrow 190\beta$   | 18           | $\text{O}_2$ | Mn d                | LMCT              |
| 4          | 25119.5 | 0.000522                       | $187\beta \rightarrow 188\beta$ | 47                                | $\text{O}_2$ | Mn d         | LMCT                |                   |
|            |         |                                | $187\beta \rightarrow 189\beta$ | 30                                | $\text{O}_2$ | Mn d         | LMCT                |                   |
